# Supplementary material for: Preclinical Evaluation of HER2-Targeting DARPin G3: Impact of Albumin-Binding Domain (ABD) Fusion
Source: MDPI journal article supplement (doi:10.3390/ijms25084246), 2024-04-11
Supplement: s1 [file s1]

**Figure S1.** Amino acid sequences of the DARPin constructs

The amino acid sequence of G3-ABD was as follows:

MRGSHEHEHEGSDLGKKLLEAARAGQDDEVRLMANGADVNAKDEYGLTPLYLAT  
AHGHLEIVEVLLKNGADVNAVDAIGFTPLHLAAFIGHLEIAEVLLKHGADVNAQDKF  
GKTAFDISIGNGNEDLAEILQKLNWSSGSSSGSSSLAEAKVLANRELDKYGVSDFYKR  
LINKAKTVEGVEALKLHILAALPGSEEEEC.

The amino acid sequence for ABD-G3 was as follows:

SHEHEHEGSLAEAKVLANRELDKYGVSDFYKRLINKAKTVEGVEALKLHIL-  
AALPGSSSGSSSGSSSDLGKKLLEAARAGQDDEVRLMANGADVNAKDEYGLTPLYL  
ATAHGHLEIVEVLLKNGADVNAVDAIGFTPLHLAAFIGHLEIAEVLLKHGADVNAQD  
KFGKTAFDISIGNGNEDLAEILQKLNGEEEC.

The amino acid sequence for G3 was as follows:

MRGSHEHEHEGSDLGKKLLEAARAGQDDEVRLMANGADVNAKDEYGLT-  
PLYLATAHGHLEIVEVLLKNGADVNAVDAIGFTPLHLAAFIGHLEIAEVLLKHGADV  
NAQDKFGKTAFDISIGNGNEDLAEILQKLNGEEEC.

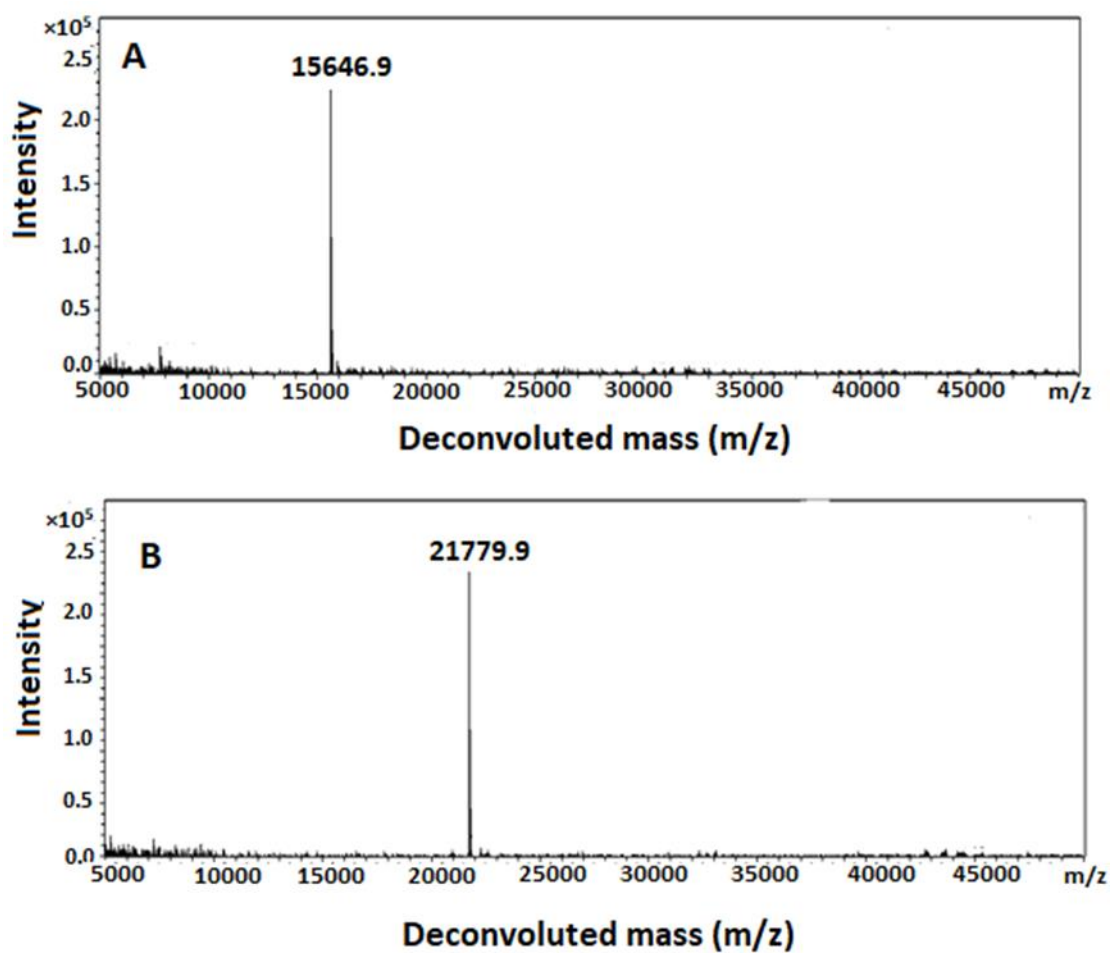

**Figure S2.** ESI-MS spectra of (A) G3-DOTA and (B) G3-ABD-DOTA. Calculated molecular weight was 15648.8 and 21779.9 for  $(\text{HE})_3\text{-G3-DOTA}$  and  $(\text{HE})_3\text{-G3-ABD-DOTA}$ . Found molecular weight 15646.9 for G3-DOTA and 21779.9 for G3-ABD-DOTA.

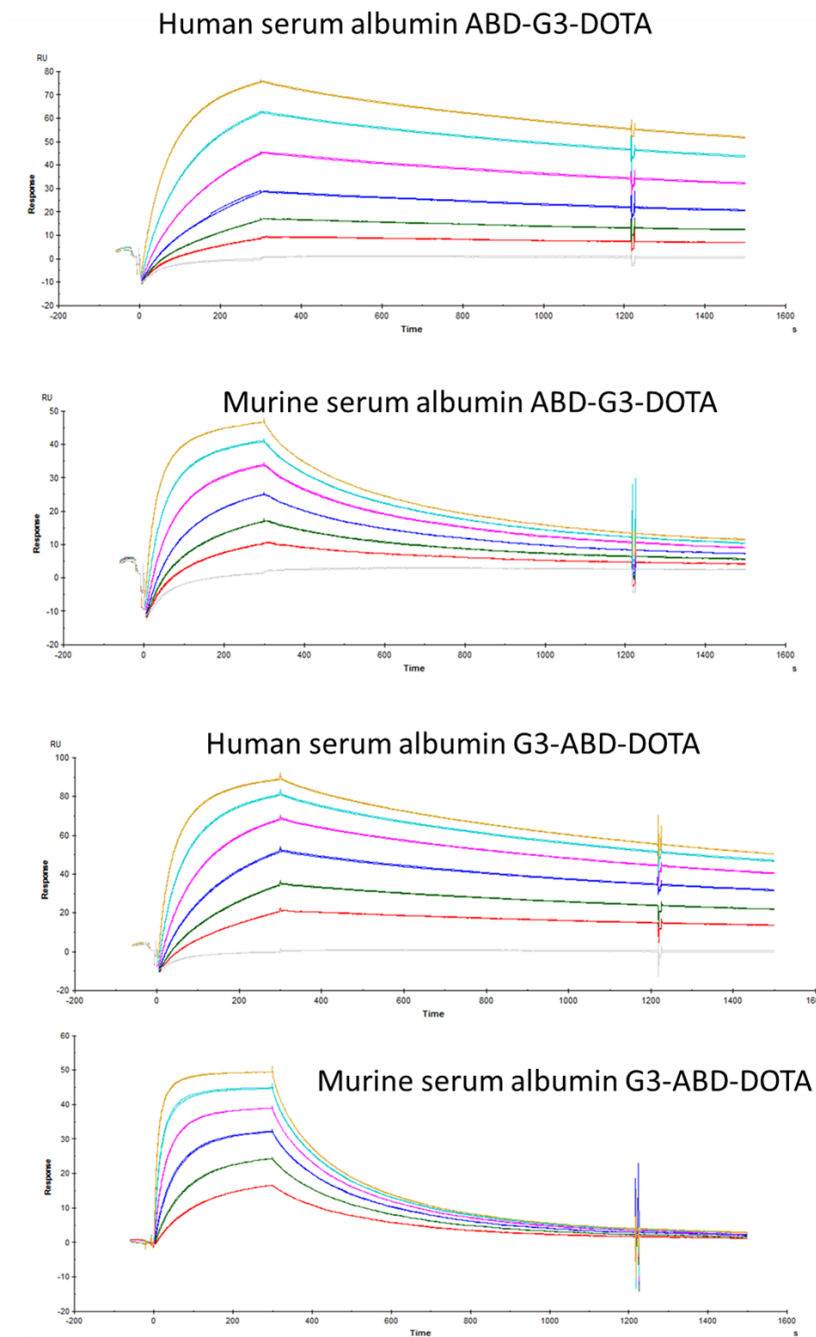

**Figure S3.** Surface plasmon resonance sensorgrams of ABD-fused DARPins binding to human and murine serum albumin.

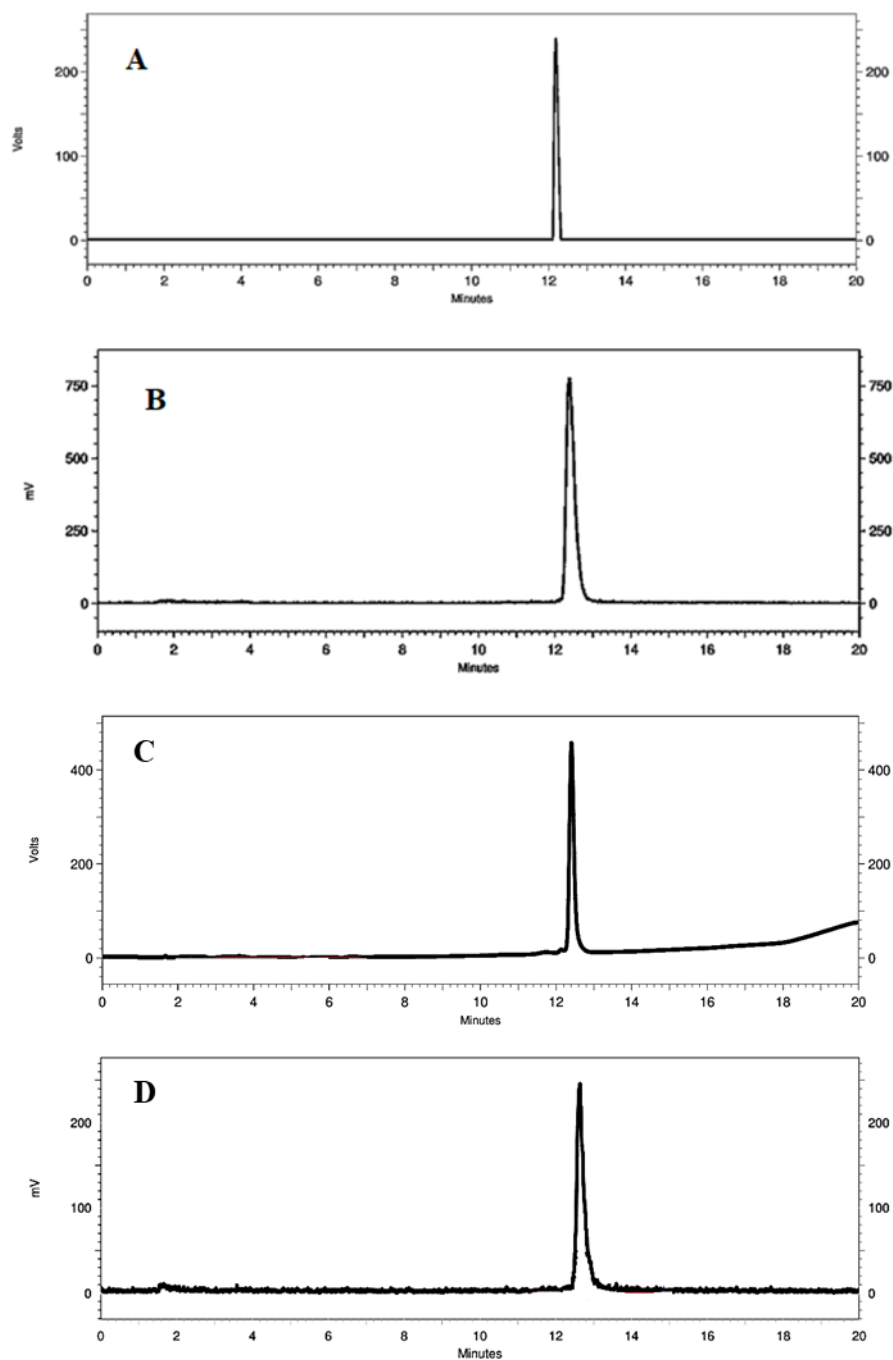

**Figure S4.** Reversed-phase HPLC chromatograms (UV detection) of non-labelled (A) G3-ABD and (C) ABD-G3 and radio chromatograms of (B) [ $^{177}\text{Lu}$ ]Lu-G3-ABD and (D) [ $^{177}\text{Lu}$ ]Lu-ABD-G3.

A Vydac RP C18 column was used for the separation (300 Å; 3 × 150 mm; 5 μm). The solvent A was 10 mM trifluoroacetic acid in water, the solvent B was 10 mM trifluoroacetic acid in acetonitrile. The gradient was 0–15 min from 5% to 70% B, 15–18 min from 70% to 95% B, and 19–20 min at 5% B. The flow rate was 1.0 mL/min. The analysis was performed using the Elite LaChrom system (Hitachi, VWR, Darmstadt, Germany) with a radiation detector (Bioscan, Washington, DC, USA)

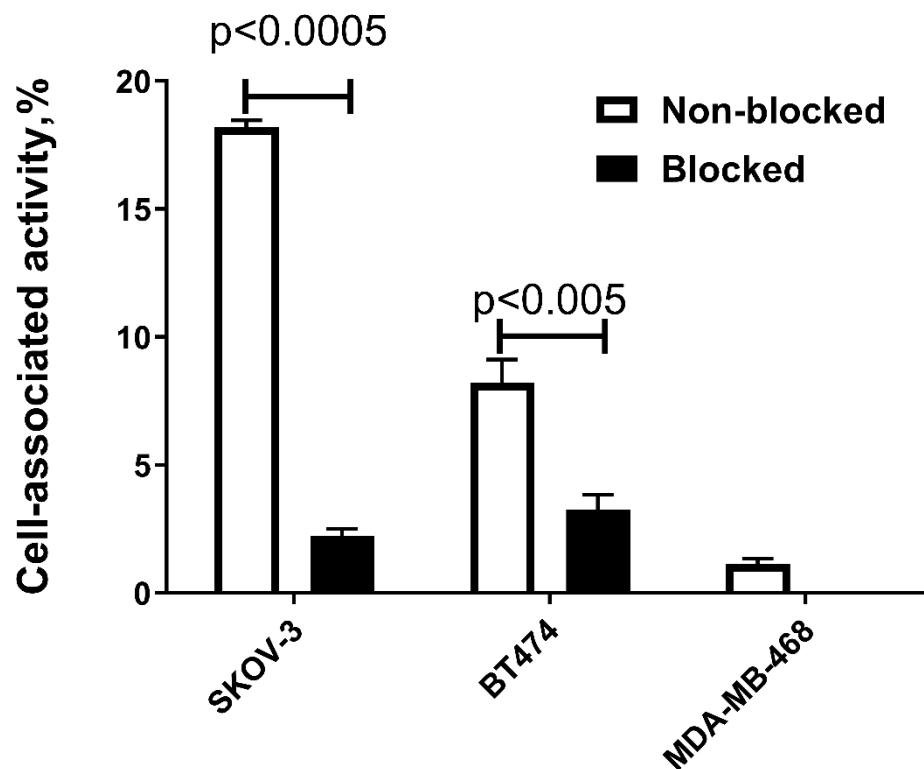

**Figure S5.** Specificity of [ $^{177}\text{Lu}$ ]Lu-G3 non-ABD-fused control protein binding *in vitro* to the SKOV-3, BT-474 (HER2-positive) and MDA-MB-468 (HER2-negative) cell lines. For the pre-saturation of HER2, a 100-fold molar excess of the non-radioactive DARPIn G3 was added before adding the labelled conjugate (2 nM). The data are presented as an average value from three samples  $\pm$  SD.
